# Supplementary material for: Galectin-9 promotes natural killer cells activity via interaction with CD44
Source: PubMed Central journal article supplement (PMC10060867; doi:10.3389/fimmu.2023.1131379), 2023-03-16

# Supplemental Figure 1

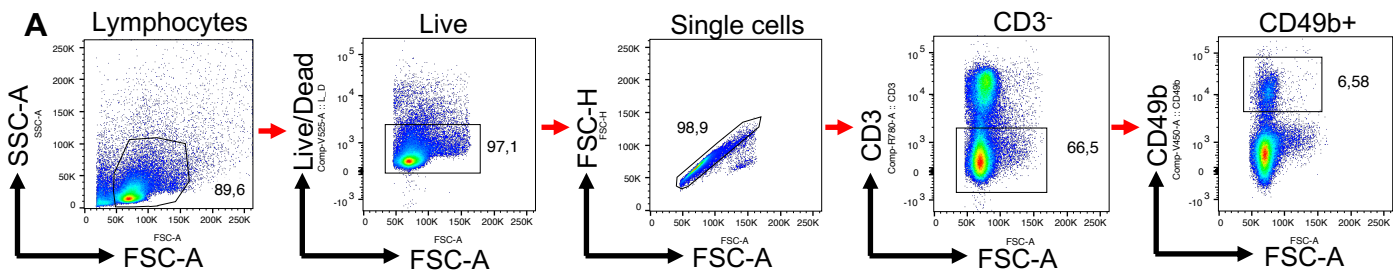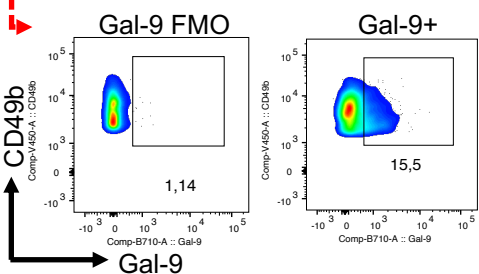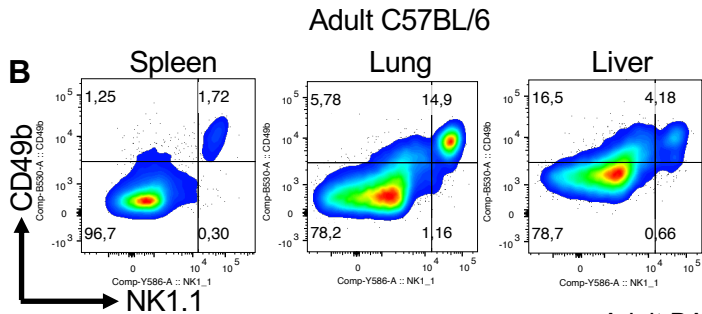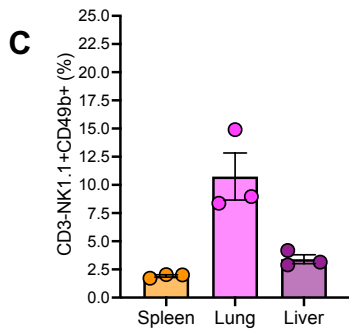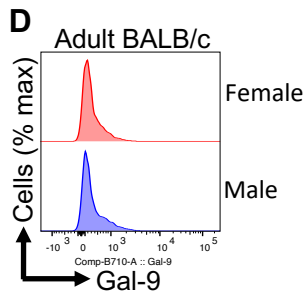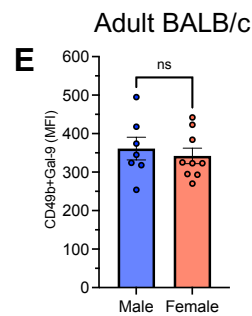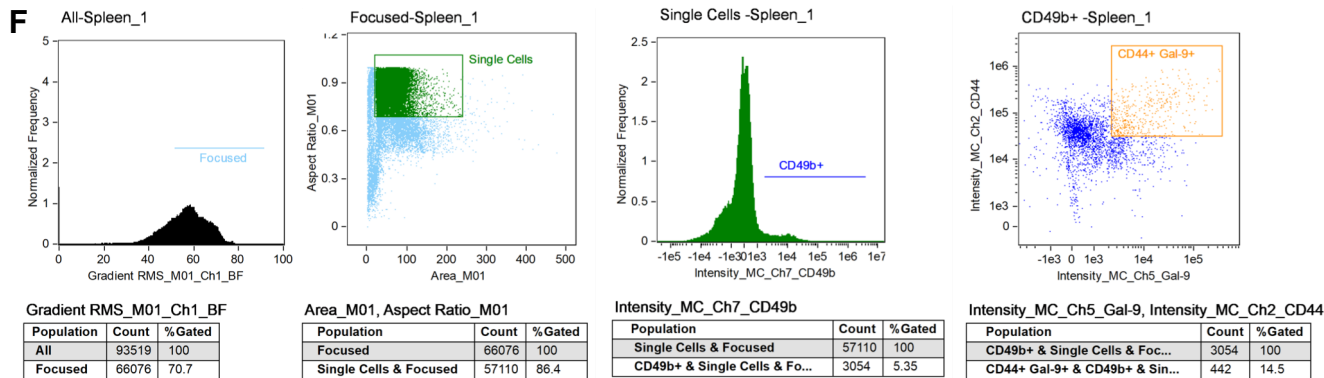

# Supplemental Figure 2

C57BL/6 Spleen day 21 male

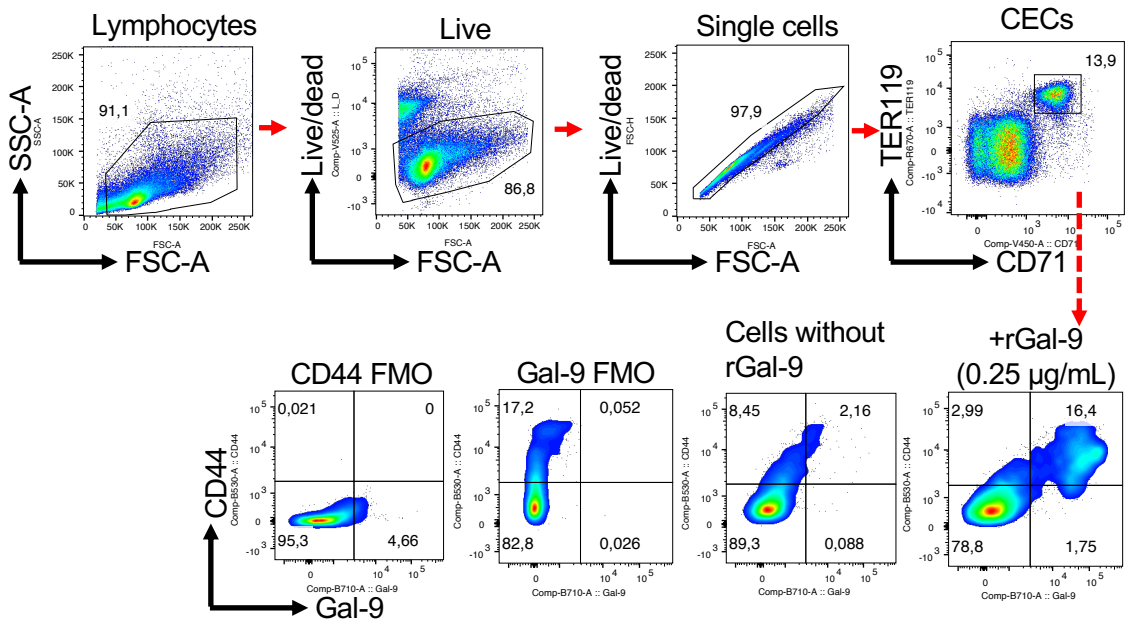

Supplement: DataSheet_1.pdf [file DataSheet_1.pdf]
